# Supplementary material for: Defining the causes of sporadic Parkinson’s disease in the global Parkinson’s genetics program (GP2)
Source: bioRxiv or medRxiv preprint supplement (doi:10.1101/2022.11.25.22282764), 2023-05-15
Supplement: Supplementary file [file media-1.pdf]

## Global Parkinson's Genetics Program (GP2) Banner Authors

This project was supported by the Global Parkinson's Genetics Program (GP2). GP2 is funded by the Aligning Science Against Parkinson's (ASAP) initiative and implemented by The Michael J. Fox Foundation for Parkinson's Research (<https://gp2.org>)

Members: 206

Version date: November 10, 2022

| Country   | Name                      | Institution                                                                      | Funders and Disclosures                                                                                                                                   |
|-----------|---------------------------|----------------------------------------------------------------------------------|-----------------------------------------------------------------------------------------------------------------------------------------------------------|
| Argentina | Emilia M Gatto            | Sanatorio de la Trinidad Mitre - INEBA                                           | Nothing to declare                                                                                                                                        |
|           | Marcelo Kauffman          | Hospital JM Ramos Mejia                                                          | I am an employee of CONICET                                                                                                                               |
| Armenia   | Samson Khachatryan        | Somnus Neurology Clinic                                                          | Nothing to declare                                                                                                                                        |
|           | Zaruhi Tavadyan           | Somnus Neurology Clinic                                                          | Nothing to declare                                                                                                                                        |
| Australia | Claire E Shepherd         | Neuroscience Research Australia                                                  | The Sydney Brain Bank is located at and supported by Neuroscience Research Australia                                                                      |
|           | Julie Hunter              | ANZAC Research Institute                                                         | Nothing to declare                                                                                                                                        |
|           | Kishore Kumar             | Garvan Institute of Medical Research and Concord Repatriation General Hospital   | Paul Ainsworth Family Foundation                                                                                                                          |
|           | Melina Ellis              | Concord Hospital                                                                 | Nothing to declare                                                                                                                                        |
|           | Miguel E. Rentería        | QIMR Berghofer Medical Research Institute                                        | The Australian Parkinson's Genetics Study is supported by the Shake It Up Australia Foundation and The Michael J. Fox Foundation for Parkinson's Research |
|           | Sulev Koks                | Murdoch University                                                               | Nothing to declare                                                                                                                                        |
| Austria   | Alexander Zimprich        | Medical University Vienna Austria                                                | Nothing to declare                                                                                                                                        |
| Brazil    | Artur F. Schumacher-Schuh | Universidade Federal do Rio Grande do Sul / Hospital de Clínicas de Porto Alegre | Nothing to declare                                                                                                                                        |

|            |                         |                                                       |                                      |
|------------|-------------------------|-------------------------------------------------------|--------------------------------------|
|            | Carlos Rieder           | Federal University of Health Sciences of Porto Alegre | Nothing to declare                   |
|            | Vitor Tumas             | University of São Paulo                               | Nothing to declare                   |
| Canada     | Edward A. Fon           | Montreal Neurological Institute                       | Nothing to declare                   |
|            | Oury Monchi             | Institut universitaire de gériatrie de Montréal       | CIHR, Brain Canada, Parkinson Canada |
|            | Ted Fon                 | McGill University                                     | Nothing to declare                   |
| Chile      | Benjamin Pizarro        | Universidad de Chile                                  | Nothing to declare                   |
|            | Maria Leonor Bustamante | Faculty of Medicine Universidad de Chile              | Nothing to declare                   |
|            | Marcelo Miranda         | Fundación Diagnosis                                   | Nothing to declare                   |
|            | Patricio Olguin         | University of Chile                                   | Nothing to declare                   |
|            | Pedro Chana             | CETRAM                                                | Nothing to declare                   |
| China      | Beisha Tang             | Central South University                              | Nothing to declare                   |
|            | Huifang Shang           | West China Hospital Sichuan University                | Nothing to declare                   |
|            | Jifeng Guo              | Xiangya Hospital                                      | Nothing to declare                   |
|            | Piu Chan                | Capital Medical University                            | Nothing to declare                   |
|            | Wei Luo                 | Zhejiang University                                   | Nothing to declare                   |
|            | Xiaopu Zhou             | The Hong Kong University of Science and Technology    | Nothing to declare                   |
| Colombia   | Gonzalo Arboleda        | Universidad Nacional de Colombia                      | Nothing to declare                   |
|            | Jorge Orozco            | Fundación Valle del Lili                              | Nothing to declare                   |
|            | Marlene Jimenez del Rio | University of Antioquia                               | Nothing to declare                   |
| Costa Rica | Alvaro Hernandez        | University of Costa Rica                              | Nothing to declare                   |
| Egypt      | Mohamed Salama          | The American University in Cairo                      | The AUC/ ASRT/ DAAD                  |
|            | Walaa A. Kamel          | Beni-Suef University                                  | Nothing to declare                   |
| France     | Alexis Brice            | Paris Brain Institute                                 | Nothing to declare                   |
|            | Jean-Christophe Corvol  | Sorbonne Université                                   | Nothing to declare                   |
| Germany    | Anastasia Illarionova   | Deutsches Zentrum für Neurodegenerative Erkrankungen  | Nothing to declare                   |

|        |                       |                                                                       |                                                                                                                                                                                                                  |
|--------|-----------------------|-----------------------------------------------------------------------|------------------------------------------------------------------------------------------------------------------------------------------------------------------------------------------------------------------|
|        | Brit Mollenhauer      | University Medical Center Göttingen                                   | Nothing to declare                                                                                                                                                                                               |
|        | Christine Klein       | University of Luebeck                                                 | CK serves as a medical Advisor to Centogene on genetic testing reports in the field of movement disorders, except Parkinson's disease, and is a member of the Scientific Advisory Board of Retromer Therapeutics |
|        | Eva-Juliane Vollstedt | University of Luebeck                                                 | Nothing to declare                                                                                                                                                                                               |
|        | Günter Höglinger      | Hannover Medical School                                               | Nothing to declare                                                                                                                                                                                               |
|        | Harutyun Madoev       | University of Luebeck                                                 | Nothing to declare                                                                                                                                                                                               |
|        | Johanna Junker        | University of Luebeck                                                 | Nothing to declare                                                                                                                                                                                               |
|        | Karisha Roopnarain    | University of Luebeck                                                 | Nothing to declare                                                                                                                                                                                               |
|        | Katja Lohmann         | University of Luebeck                                                 | Nothing to declare                                                                                                                                                                                               |
|        | Lara M. Lange         | University of Lübeck and University Medical Center Schleswig-Holstein | Nothing to declare                                                                                                                                                                                               |
|        | Manu Sharma           | University of Tübingen                                                | Dr. Sharma is further funded by the Michael J Fox Foundation, USA Genetic Diversity in PD Program: GAP-India Grant ID: 009411.                                                                                   |
|        | Peter Heutink         | German Center for Neurodegenerative Diseases (DZNE)                   | Consultant for Neuron23 Inc.                                                                                                                                                                                     |
|        | Sergio Groppa         | University of Mainz                                                   | Nothing to declare                                                                                                                                                                                               |
|        | Thomas Gasser         | University of Tübingen                                                | Nothing to declare                                                                                                                                                                                               |
|        | Zih-Hua Fang          | The German Center for Neurodegenerative Diseases                      | Nothing to declare                                                                                                                                                                                               |
| Ghana  | Albert Akpalu         | University of Ghana Medical School                                    | Nothing to declare                                                                                                                                                                                               |
|        | Vida Obese            | Queen Square Institute of Neurology                                   | Nothing to declare                                                                                                                                                                                               |
| Greece | Georgia Xiromerisiou  | University of Thessaly                                                | Nothing to declare                                                                                                                                                                                               |
|        | Georgios Hadjigorgiou | University of Thessaly                                                | Nothing to declare                                                                                                                                                                                               |
|        | Ioannis Dagklis       | Aristotle University of Thessaloniki                                  | Nothing to declare                                                                                                                                                                                               |

|           |                           |                                                                   |                                                                |
|-----------|---------------------------|-------------------------------------------------------------------|----------------------------------------------------------------|
|           | Ioannis Tarnanas          | Ionian University                                                 | Nothing to declare                                             |
|           | Leonidas Stefanis         | Biomedical research Foundation of the Academy of Athens           | PPMI2 (funded by MJFF), ALAMEDA (H2020 grant), funding by HFRI |
|           | Maria Stamelou            | Diagnostic and Therapeutic Centre HYGEIA Hospital                 | Nothing to declare                                             |
|           | Efthymios Dadiotis        | University of Thessaly                                            | Nothing to declare                                             |
| Honduras  | Alex Medina               | Hospital San Felipe                                               | Nothing to declare                                             |
| Hong Kong | Germaine Hiu-Fai Chan     | Queen Elizabeth Hospital                                          | Nothing to declare                                             |
|           | Nancy Ip                  | Hong Kong University of Science and Technology                    | Nothing to declare                                             |
|           | Nelson Yuk-Fai Cheung     | Queen Elizabeth Hospital                                          | Nothing to declare                                             |
|           | Phillip Chan              | Hong Kong University of Science and Technology                    | Nothing to declare                                             |
| India     | Asha Kishore              | Aster Medcity                                                     | Michael J Fox Foundation                                       |
|           | Divya KP                  | Sree Chitra Tirunal Institute for Medical Sciences and Technology | Nothing to declare                                             |
|           | Pramod Pal                | National Institute of Mental Health & Neurosciences               | Nothing to declare                                             |
|           | Prashanth Lingappa Kukkle | Manipal Hospital                                                  | Nothing to declare                                             |
|           | Roopa Rajan               | All India Institute of Medical Sciences                           | Nothing to declare                                             |
|           | Rupam Borgohain           | Nizam's Institute Of Medical Sciences                             | Nothing to declare                                             |
| Italy     | Andrea Quattrone          | University "Magna Graecia" of Catanzaro                           | Nothing to declare                                             |
|           | Enza Maria Valente        | University of Pavia                                               | Nothing to declare                                             |
|           | Lucilla Parnetti          | University of Perugia                                             | Nothing to declare                                             |
|           | Micol Avenali             | University of Pavia                                               | Nothing to declare                                             |
|           | Tommaso Schirinzi         | University of Rome Tor Vergata                                    | Nothing to declare                                             |
| Japan     | Manabu Funayama           | Juntendo University                                               | Nothing to declare                                             |
|           | Nobutaka Hattori          | Juntendo University faculty of medicine                           | Nothing to declare                                             |

|             |                               |                                                                                           |                                                                                                                         |
|-------------|-------------------------------|-------------------------------------------------------------------------------------------|-------------------------------------------------------------------------------------------------------------------------|
|             | Tomotaka Shiraishi            | Jikei University<br>School of Medicine                                                    | Nothing to declare                                                                                                      |
| Kazakhstan  | Altynay Karimova              | Institute of Neurology<br>and<br>Neurorehabilitation                                      | Nothing to declare                                                                                                      |
|             | Rauan Kaiyrzhanov             | University College<br>London                                                              | Nothing to declare                                                                                                      |
|             | Gulnaz<br>Kaishibayeva        | Institute of neurology<br>and<br>neurorehabilitation<br>named after Smagul<br>Kaishibayev | Nothing to declare                                                                                                      |
| Luxembourg  | Rejko Krüger                  | University of<br>Luxembourg                                                               | Nothing to declare                                                                                                      |
| Malaysia    | Ai Huey Tan                   | University of Malaya                                                                      | Nothing to declare                                                                                                      |
|             | Azlina Ahmad-<br>Annuar       | University of Malaya                                                                      | Nothing to declare                                                                                                      |
|             | Mohamed Ibrahim<br>Norlinah   | Universiti<br>Kebangsaan<br>Malaysia                                                      | Nothing to declare                                                                                                      |
|             | Nor Azian Abdul<br>Murad      | UKM Medical<br>Molecular Biology<br>Institute (UMBI)                                      | Nothing to declare                                                                                                      |
|             | Norlinah Mohamed<br>Ibrahim   | Universiti<br>Kebangsaan<br>Malaysia Medical<br>Centre                                    | Nothing to declare                                                                                                      |
|             | Shahrul Azmin                 | Universiti<br>Kebangsaan<br>Malaysia Medical<br>Centre                                    | Nothing to declare                                                                                                      |
|             | Shen-Yang Lim                 | University of Malaya                                                                      | Nothing to declare                                                                                                      |
|             | Wael My Mohamed               | International Islamic<br>University                                                       | Nothing to declare                                                                                                      |
|             | Yi Wen                        | University of Malaya                                                                      | Nothing to declare                                                                                                      |
| Mexico      | Daniel Martinez-<br>Ramirez   | Tecnologico de<br>Monterrey                                                               | Nothing to declare                                                                                                      |
|             | Mayela Rodriguez-<br>Violante | Instituto Nacional de<br>Neurologia y<br>Neurocirugia                                     | Nothing to declare                                                                                                      |
|             | Paula Reyes-Pérez             | Universidad Nacional<br>Autónoma de México                                                | Nothing to declare                                                                                                      |
| Nepal       | Rajeev Ojha                   | Tribhuvan University                                                                      | Nothing to declare                                                                                                      |
| New Zealand | Tim Anderson                  | University of Otago                                                                       | Health Research Council of New<br>Zealand; MBIE (NZ),<br>Neurological Foundation of New<br>Zealand; University of Otago |

|              |                      |                                                     |                                                                                                                                                                                                                                                 |
|--------------|----------------------|-----------------------------------------------------|-------------------------------------------------------------------------------------------------------------------------------------------------------------------------------------------------------------------------------------------------|
|              | Toni Pitcher         | University of Otago                                 | Funding - Health Research Council of New Zealand                                                                                                                                                                                                |
| Nigeria      | Njideka Okubadejo    | University of Lagos                                 | Michael J Fox Foundation; Tertiary Education Trust Fund (TETFUND) National Research Fund                                                                                                                                                        |
|              | Olaitan Okunoye      | University College London                           | Nothing to declare                                                                                                                                                                                                                              |
|              | Oluwadamilola Ojo    | College of Medicine of the University of Lagos      | Nothing to declare                                                                                                                                                                                                                              |
| Norway       | Jan O. Aasly         | Norwegian University of Science and Technology      | Nothing to declare                                                                                                                                                                                                                              |
|              | Lasse Pihlstrøm      | Oslo University Hospital                            | Southeastern Regional Health Authority, Norway                                                                                                                                                                                                  |
|              | Manuela Tan          | Oslo University Hospital                            | My postdoctoral position is funded by a grant to Dr Lasse Pihlstrøm from the Southern and Eastern Norway Regional Health Authority (Helse Sør-Ost). I have also received funding as a co-PI for a small grant from the Michael J Fox Foundation |
| Pakistan     | Shoaib ur Rehman     | University of science and Technology Bannu          | Nothing to declare                                                                                                                                                                                                                              |
| Peru         | Miguel Inca-Martinez | Cleveland Clinic                                    | Nothing to declare                                                                                                                                                                                                                              |
|              | Mario Cornejo-Olivas | Instituto Nacional de Ciencias Neurologicas         | Nothing to declare                                                                                                                                                                                                                              |
| Puerto Rico  | Angel Vinuela        | University of Puerto Rico                           | Nothing to declare                                                                                                                                                                                                                              |
| Russia       | Elena Iakovenko      | Research Center of Neurology                        | Nothing to declare                                                                                                                                                                                                                              |
| Saudi Arabia | Bashayer Almubarak   | King Faisal Specialist Hospital and Research Center | Nothing to declare                                                                                                                                                                                                                              |
|              | Muhammad Umair       | King Abdullah International Medical Research Center | Nothing to declare                                                                                                                                                                                                                              |
| Singapore    | Jia Nee Foo          | Nanyang Technological University                    | Singapore National Medical Research Council (MOH-000559)                                                                                                                                                                                        |
| South Africa | Jonathan Carr        | University of Stellenbosch                          | Nothing to declare                                                                                                                                                                                                                              |

|             |                      |                                                  |                                                                                                                                                                                                                                                                                                                                                       |
|-------------|----------------------|--------------------------------------------------|-------------------------------------------------------------------------------------------------------------------------------------------------------------------------------------------------------------------------------------------------------------------------------------------------------------------------------------------------------|
|             | Soraya Bardien       | Stellenbosch University                          | This work is based on the research supported in part by the South African Medical Research Council [Self-Initiated Research Grant]; the National Research Foundation of South Africa [Grant Number 129249]; and the South African Medical Research Council/Stellenbosch University Genomics of Brain Disorders Research Unit, Cape Town, South Africa |
| South Korea | Beomseok Jeon        | Seoul National University Hospital               | Nothing to declare                                                                                                                                                                                                                                                                                                                                    |
|             | Yun Joong Kim        | Yongin Severance Hospital                        | Nothing to declare                                                                                                                                                                                                                                                                                                                                    |
| Spain       | Janet Hoenicka       | Institut de Recerca Sant Joan de Deu             | Fondo de Investigación Sanitaria, Instituto Salud Carlos III, Grant PI019/00126                                                                                                                                                                                                                                                                       |
|             | Maria Teresa Perifan | Instituto de Biomedicina de Sevilla              | Nothing to declare                                                                                                                                                                                                                                                                                                                                    |
|             | Pau Pastor           | University Hospital Germans Trias i Pujol        | Nothing to declare                                                                                                                                                                                                                                                                                                                                    |
| Sudan       | Sarah El-Sadig       | Faculty of medicine university of Khartoum       | Nothing to declare                                                                                                                                                                                                                                                                                                                                    |
| Taiwan      | Chin-Hsien Lin       | National Taiwan University Hospital              | Nothing to declare                                                                                                                                                                                                                                                                                                                                    |
|             | Hsiu-Chuan Wu        | Chang Gung Memorial Hospital                     | Nothing to declare                                                                                                                                                                                                                                                                                                                                    |
|             | Pin-Jui Kung         | Genome and systems biology degree program        | Nothing to declare                                                                                                                                                                                                                                                                                                                                    |
|             | Ruey-meei Wu         | National Taiwan University Hospital              | I have funding from 1. Minister of Science and Technology, Taiwan Government; 2. National Taiwan University, 3 Parkinson foundation, USA, 4. Michael J Fox Foundation.                                                                                                                                                                                |
|             | Serena Wu            | Chang Gung University                            | Nothing to declare                                                                                                                                                                                                                                                                                                                                    |
|             | Yihru Wu             | Chang Gung Memorial Hospital                     | Nothing to declare                                                                                                                                                                                                                                                                                                                                    |
| Tunisia     | Rim Amouri           | National Institute Mongi Ben Hamida of Neurology | Nothing to declare                                                                                                                                                                                                                                                                                                                                    |

|                |                             |                                                       |                                                                                                                                                                                                                                                                                                                                                                                                            |
|----------------|-----------------------------|-------------------------------------------------------|------------------------------------------------------------------------------------------------------------------------------------------------------------------------------------------------------------------------------------------------------------------------------------------------------------------------------------------------------------------------------------------------------------|
|                | Samia Ben Sassi             | Mongi Ben Hmida<br>National Institute of<br>Neurology | Nothing to declare                                                                                                                                                                                                                                                                                                                                                                                         |
| Turkey         | A. Nazlı Başak              | Koç University                                        | Kirac Foundation and Koc Univ.                                                                                                                                                                                                                                                                                                                                                                             |
|                | Gencer Genc                 | Şişli Etfal Training<br>and Research<br>Hospital      | Nothing to declare                                                                                                                                                                                                                                                                                                                                                                                         |
|                | Nazli Basak                 | Koc University                                        | Nothing to declare                                                                                                                                                                                                                                                                                                                                                                                         |
|                | Özgür Öztop<br>Çakmak       | Koç University                                        | Nothing to declare                                                                                                                                                                                                                                                                                                                                                                                         |
|                | Sibel Ertan                 | Koç University<br>Medical School                      | Nothing to declare                                                                                                                                                                                                                                                                                                                                                                                         |
| United Kingdom | Alastair Noyce              | Queen Mary<br>University of London                    | Prof. Noyce reports grants from Parkinson's UK, Barts Charity, Cure Parkinson's, NIHR, Innovate UK, Virginia Keiley benefaction, Alchemab, Aligning Science Across Parkinson's and Michael J Fox Foundation. Consultancy and personal fees from Astra Zeneca, AbbVie, Profile, Roche, Biogen, UCB, Bial, Charco Neurotech, uMedeor and Britannia.                                                          |
|                | Alejandro Martínez-Carrasco | University College<br>London                          | GP2                                                                                                                                                                                                                                                                                                                                                                                                        |
|                | Camille Carroll             | University of<br>Plymouth                             | C Carroll receives salary from University of Plymouth, University Hospitals Plymouth NHS Trust and National Institute of Health Research; she has received advisory, consulting, and/or lecture fees from AbbVie, Bial, Lundbeck, Global Kinetics, Britannia and Medscape, and research funding from Parkinson's UK, Edmond J Safra Foundation, National Institute of Health Research and Cure Parkinson's |
|                | Claire Bale                 | Parkinson's UK                                        | Nothing to declare                                                                                                                                                                                                                                                                                                                                                                                         |
|                | Clodagh Towns               | University College<br>London                          | Nothing to declare                                                                                                                                                                                                                                                                                                                                                                                         |
|                | Ellie Stafford              | University College<br>London                          | Nothing to declare                                                                                                                                                                                                                                                                                                                                                                                         |
|                | Henry Houlden               | University College<br>London                          | Nothing to declare                                                                                                                                                                                                                                                                                                                                                                                         |



|     |                      |                                                        |                                                                                                                                                                                                                                                                                                                                                                                                                                                                                                  |
|-----|----------------------|--------------------------------------------------------|--------------------------------------------------------------------------------------------------------------------------------------------------------------------------------------------------------------------------------------------------------------------------------------------------------------------------------------------------------------------------------------------------------------------------------------------------------------------------------------------------|
|     | Huw R Morris         | University College London                              | Dr Morris is employed by UCL. In the last 12 months he reports paid consultancy from Roche and Amylyx ; lecture fees/honoraria - BMJ, Kyowa Kirin, Movement Disorders Society. Research Grants from Parkinson's UK, Cure Parkinson's Trust, PSP Association, CBD Solutions, Drake Foundation, Medical Research Council, Michael J Fox Foundation. Dr Morris is a co-applicant on a patent application related to C9ORF72 - Method for diagnosing a neurodegenerative disease (PCT/GB2012/052140) |
|     | John Hardy           | University College London                              | Nothing to declare                                                                                                                                                                                                                                                                                                                                                                                                                                                                               |
|     | Joseph Callanan      | Queen Mary University of London                        | Nothing to declare                                                                                                                                                                                                                                                                                                                                                                                                                                                                               |
|     | Kin Ying Mok         | University College London                              | Nothing to declare                                                                                                                                                                                                                                                                                                                                                                                                                                                                               |
|     | Mie Rizig            | University College London                              | Nothing to declare                                                                                                                                                                                                                                                                                                                                                                                                                                                                               |
|     | Nicholas Wood        | University College London                              | ASAP- CRN                                                                                                                                                                                                                                                                                                                                                                                                                                                                                        |
|     | Nigel Williams       | Cardiff University                                     | Parkinson's UK                                                                                                                                                                                                                                                                                                                                                                                                                                                                                   |
|     | Patrick Alfryn Lewis | Royal Veterinary College University of London          | MJFF, UKRI (BBSRC, EPSRC), Parkinson's UK, ASAP research network network                                                                                                                                                                                                                                                                                                                                                                                                                         |
|     | Rimona Weil          | University College London                              | Nothing to declare                                                                                                                                                                                                                                                                                                                                                                                                                                                                               |
|     | Simona Jasaitye      | University College London                              | Nothing to declare                                                                                                                                                                                                                                                                                                                                                                                                                                                                               |
|     | Simon Stott          | Cure Parkinson's                                       | Employee of Cure Parkinson's                                                                                                                                                                                                                                                                                                                                                                                                                                                                     |
|     | Sumit Dey            | Queen Mary University of London                        | Nothing to declare                                                                                                                                                                                                                                                                                                                                                                                                                                                                               |
| USA | Alberto Espay        | University of Cincinnati                               | Nothing to declare                                                                                                                                                                                                                                                                                                                                                                                                                                                                               |
|     | Alyssa O'Grady       | The Michael J. Fox Foundation for Parkinson's Research | Nothing to declare                                                                                                                                                                                                                                                                                                                                                                                                                                                                               |
|     | Andrew B Singleton   | National Institute on Aging                            | Michael J Fox Foundation for Parkinson's disease Research. Aligning Science Across Parkinson's Initiative                                                                                                                                                                                                                                                                                                                                                                                        |

|                       |                                                                               |                                                                                                                                                                                                                                                                                                                                                                                                                                                                                                                     |
|-----------------------|-------------------------------------------------------------------------------|---------------------------------------------------------------------------------------------------------------------------------------------------------------------------------------------------------------------------------------------------------------------------------------------------------------------------------------------------------------------------------------------------------------------------------------------------------------------------------------------------------------------|
| Andrew K. Sobering    | Augusta University / University of Georgia Medical Partnership                | Nothing to declare                                                                                                                                                                                                                                                                                                                                                                                                                                                                                                  |
| Bernadette Siddiqi    | The Michael J. Fox Foundation for Parkinson's Research                        | Nothing to declare                                                                                                                                                                                                                                                                                                                                                                                                                                                                                                  |
| Bradford Casey        | The Michael J Fox Foundation for Parkinson's Research                         | Nothing to declare                                                                                                                                                                                                                                                                                                                                                                                                                                                                                                  |
| Brian Fiske           | The Michael J. Fox Foundation for Parkinson's Research                        | Nothing to declare                                                                                                                                                                                                                                                                                                                                                                                                                                                                                                  |
| Cabell Jonas          | Mid-Atlantic Permanente Medical Group / Kaiser Permanente Mid-Atlantic States | Nothing to declare                                                                                                                                                                                                                                                                                                                                                                                                                                                                                                  |
| Caroline B. Pantazis  | National Institutes of Health                                                 | Nothing to declare                                                                                                                                                                                                                                                                                                                                                                                                                                                                                                  |
| Claire Wegel          | Indiana University                                                            | Nothing to declare                                                                                                                                                                                                                                                                                                                                                                                                                                                                                                  |
| Cornelis Blauwendraat | National Institutes of Health                                                 | Nothing to declare                                                                                                                                                                                                                                                                                                                                                                                                                                                                                                  |
| Dan Vitale            | National Institutes of Health                                                 | Nothing to declare                                                                                                                                                                                                                                                                                                                                                                                                                                                                                                  |
| Deborah Hall          | Rush University                                                               | Nothing to declare                                                                                                                                                                                                                                                                                                                                                                                                                                                                                                  |
| Dena Hernandez        | National Institutes of Health                                                 | Nothing to declare                                                                                                                                                                                                                                                                                                                                                                                                                                                                                                  |
| Ejaz Shiamim          | Kaiser Permanente                                                             | Nothing to declare                                                                                                                                                                                                                                                                                                                                                                                                                                                                                                  |
| Ekemini Riley         | Coalition for Aligning Science                                                | Nothing to declare                                                                                                                                                                                                                                                                                                                                                                                                                                                                                                  |
| Faraz Faghri          | National Institutes of Health                                                 | F.F.'s participation in this research was supported in part by the Intramural Research Program of the NIH, National Institute on Aging (NIA), National Institutes of Health, Department of Health and Human Services; project number ZO1 AG000535, as well as the National Institute of Neurological Disorders and Stroke. F.F.'s participation in this project was part of a competitive contract awarded to Data Tecnica International LLC by the National Institutes of Health to support open science research. |

|                               |                                                           |                                                                                                                                                                               |
|-------------------------------|-----------------------------------------------------------|-------------------------------------------------------------------------------------------------------------------------------------------------------------------------------|
| Hampton Leonard               | National Institute on Aging/National Institutes of Health | H.L.L is supported by a competitive contract awarded to Data Tecnica International LLC by the National Institutes of Health to support open science research                  |
| Hiroataka Iwaki               | Data Tecnica International                                | Nothing to declare                                                                                                                                                            |
| Honglei Chen                  | Michigan State University                                 | NIH/DoD/Parkinson Foundation/MSU Foundation/Gibby vs. Parky Foundation - No COI to disclose                                                                                   |
| Ignacio F. Mata               | Cleveland Clinic                                          | Funding from MJFF and NIH                                                                                                                                                     |
| Ignacio Juan Keller Sarmiento | Northwestern University                                   | Nothing to declare                                                                                                                                                            |
| Jared Williamson              | Kaiser Permanente                                         | Nothing to declare                                                                                                                                                            |
| Jonggeol Jeff Kim             | National Institutes of Health                             | Nothing to declare                                                                                                                                                            |
| Joseph Jankovic               | Baylor College of Medicine                                | Nothing to declare                                                                                                                                                            |
| Joshua Shulman                | Baylor College of Medicine / Texas Children's Hospital    | Collection of samples and data at Baylor College of Medicine was supported by the Huffington Foundation.                                                                      |
| Justin C. Solle               | The Michael J. Fox Foundation for Parkinson's Research    | Nothing to declare                                                                                                                                                            |
| Kaileigh Murphy               | Operations and Compliance                                 | Nothing to declare                                                                                                                                                            |
| Karen Nuytemans               | University of Miami Miller School of Medicine             | This work has been supported by the American Parkinson Disease Association and the Margaret Q. Landenberger Research Foundation.                                              |
| Karl Kiebertz                 | Beth Israel Deaconess Medical Center                      | Nothing to declare                                                                                                                                                            |
| Kenneth Marek                 | Institute for Neurodegenerative Disorders                 | Consultant for Michael J Fox Foundation, GE Healthcare, Roche, UCB, BIAL, Denali, Takeda, , Cerapsir, UCB, Biohaven, Neuron23, Aprinoia, Astellas, Calico, Genentech, Invicro |
| Lana M. Chahine               | University of Pittsburgh                                  | Nothing to declare                                                                                                                                                            |

|                           |                                                        |                                                                                                                                                                                                                                                                                                                                                                                                                                                                                               |
|---------------------------|--------------------------------------------------------|-----------------------------------------------------------------------------------------------------------------------------------------------------------------------------------------------------------------------------------------------------------------------------------------------------------------------------------------------------------------------------------------------------------------------------------------------------------------------------------------------|
| Laurel Screven            | National Institute on Aging                            | Nothing to declare                                                                                                                                                                                                                                                                                                                                                                                                                                                                            |
| Lisa Shulman              | University of Maryland                                 | Nothing to declare                                                                                                                                                                                                                                                                                                                                                                                                                                                                            |
| Luca Marsili              | University of Cincinnati                               | Nothing to declare                                                                                                                                                                                                                                                                                                                                                                                                                                                                            |
| Maggie Kuhl               | The Michael J. Fox Foundation for Parkinson's Research | Nothing to declare                                                                                                                                                                                                                                                                                                                                                                                                                                                                            |
| Marissa Dean              | University of Alabama at Birmingham                    | Dr. Dean is an investigator in studies funded by Abbvie, Inc., Hoffmann-La Roche, CHDI Foundation, Inc., Annexon, Inc., Retrophin, Inc, Neurocrine Biosciences, UniQure Biopharma B.V., Praxis Precision Medicines, Neuraly, Inc., Michael J. Fox Foundation for Parkinson's Research, and US Army Medical Research and Materiel Command (grant#W81XWH-18-1-0508). In addition, Dr. Dean receives support through the Huntington's Disease Society of American Centers of Excellence program. |
| Mary B Makarious          | National Institutes of Health                          | Nothing to declare                                                                                                                                                                                                                                                                                                                                                                                                                                                                            |
| Mike A. Nalls             | National Institutes of Health                          | M.A.N.'s participation in this project was part of a competitive contract awarded to Data Tecnica International LLC by the National Institutes of Health to support open science research. M.A.N. also currently serves as an advisor for Clover Therapeutics and Neuron23 Inc.                                                                                                                                                                                                               |
| Niccolò Emanuele Mencacci | Northwestern University                                | Nothing to declare                                                                                                                                                                                                                                                                                                                                                                                                                                                                            |
| Roy Alcalay               | Columbia University                                    | Dr. Alcalay is funded by the Michael J. Fox Foundation and the Parkinson's Foundation. He received consultation fees from Avrobio, Caraway, GSK, Merck, Sanofi, Ono Therapeutics and Takeda                                                                                                                                                                                                                                                                                                   |
| Ruqaya Murtadha           | National Institute on Aging                            | Nothing to declare                                                                                                                                                                                                                                                                                                                                                                                                                                                                            |

|         |                     |                                                        |                           |
|---------|---------------------|--------------------------------------------------------|---------------------------|
|         | Sara Bandres Ciga   | National Institutes of Health                          | Nothing to declare        |
|         | Schuyler Fox        | Michael J. Fox Foundation for Parkinson's Research     | Nothing to declare        |
|         | Sohini Chowdhury    | The Michael J. Fox Foundation for Parkinson's Research | Nothing to declare        |
|         | Steven Lubbe        | Northwestern University                                | Nothing to declare        |
|         | Tao Xie             | University of Chicago                                  | Nothing to declare        |
|         | Tatiana Foroud      | Indiana University School of Medicine                  | Michael J. Fox Foundation |
|         | Thomas Beach        | Sun Health Research Institution                        | Nothing to declare        |
|         | Todd Sherer         | The Michael J Fox Foundation for Parkinson's Research  | Nothing to declare        |
|         | Yared Z. Zewde      | University of California San Francisco                 | Nothing to declare        |
|         | Yeajin Song         | National Institutes of Health                          | Nothing to declare        |
| Vietnam | Duan Nguyen         | Hue University                                         | Nothing to declare        |
|         | Toan Nguyen         | Hue University                                         | Nothing to declare        |
| Zambia  | Masharip Atadzhanov | University of Zambia                                   | Nothing to declare        |
